# Supplementary material for: Single sensors for multiple analytes employing fluorometric differentiation for Cr3+ and Al3+ in semi-aqueous medium with bio-activity and theoretical aspects
Source: Royal Society of Chemistry journal article supplement (doi:10.1039/c8ay01080c), 2018-01-01
Supplement: c8ay01080c1.pdf [file c8ay01080c1.pdf]

# Single sensor for multiple analytes employing fluorometric differentiation for Cr<sup>3+</sup> and Al<sup>3+</sup> in semi-aqueous medium with bio-activity and theoretical aspects

Malay Dolai<sup>a,\*</sup>, Urmila Saha<sup>b</sup>, Avijit Kumar Das<sup>c,d,\*</sup> and Gopinatha Suresh Kumar<sup>b</sup>

Table S1. Crystal data and structure refinement for H<sub>2</sub>SALNN.

|                                     |                                                               |
|-------------------------------------|---------------------------------------------------------------|
| Parameters                          | (CCDC No.1814623)                                             |
| Formula                             | C <sub>16</sub> H <sub>16</sub> N <sub>2</sub> O <sub>4</sub> |
| Formula Weight                      | 300.31                                                        |
| Crystal System                      | Monoclinic                                                    |
| Space group                         | P21/n (No. 14)                                                |
| a, b, c [Å]                         | 10.3695(13) 6.0922(8)<br>11.4055(15)                          |
| α, β, γ [°]                         | 90 98.355(2) 90                                               |
| V [Å <sup>3</sup> ]                 | 712.87(16)                                                    |
| Z                                   | 2                                                             |
| D(calc) [g/cm <sup>3</sup> ]        | 1.399                                                         |
| μ(MoKα) [ /mm ]                     | 0.102                                                         |
| F(000)                              | 316                                                           |
| Crystal Size [mm]                   | 0.24 x 0.28 x 0.55                                            |
| Temperature (K)                     | 100                                                           |
| Radiation [λ, Å]                    | 0.71073                                                       |
| Theta Min-Max [°]                   | 2.5, 31.4                                                     |
| Dataset                             | -15: 15 ; -8: 8 ; -16: 16                                     |
| Tot., Uniq.Data, R(int)             | 3328, 2013, 0.013                                             |
| Observed data                       | 1834                                                          |
| [I > 2σ(I)]                         |                                                               |
| N <sub>ref</sub> , N <sub>par</sub> | 2013, 105                                                     |
| R, wR <sub>2</sub> , S              | 0.0405, 0.1172, 1.05                                          |

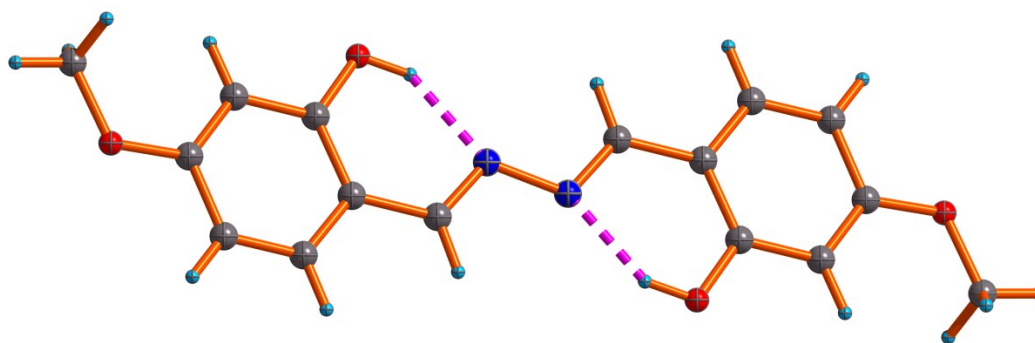

Fig.S1: The ORTEP view of centro-symmetric H<sub>2</sub>SALNN ligand.

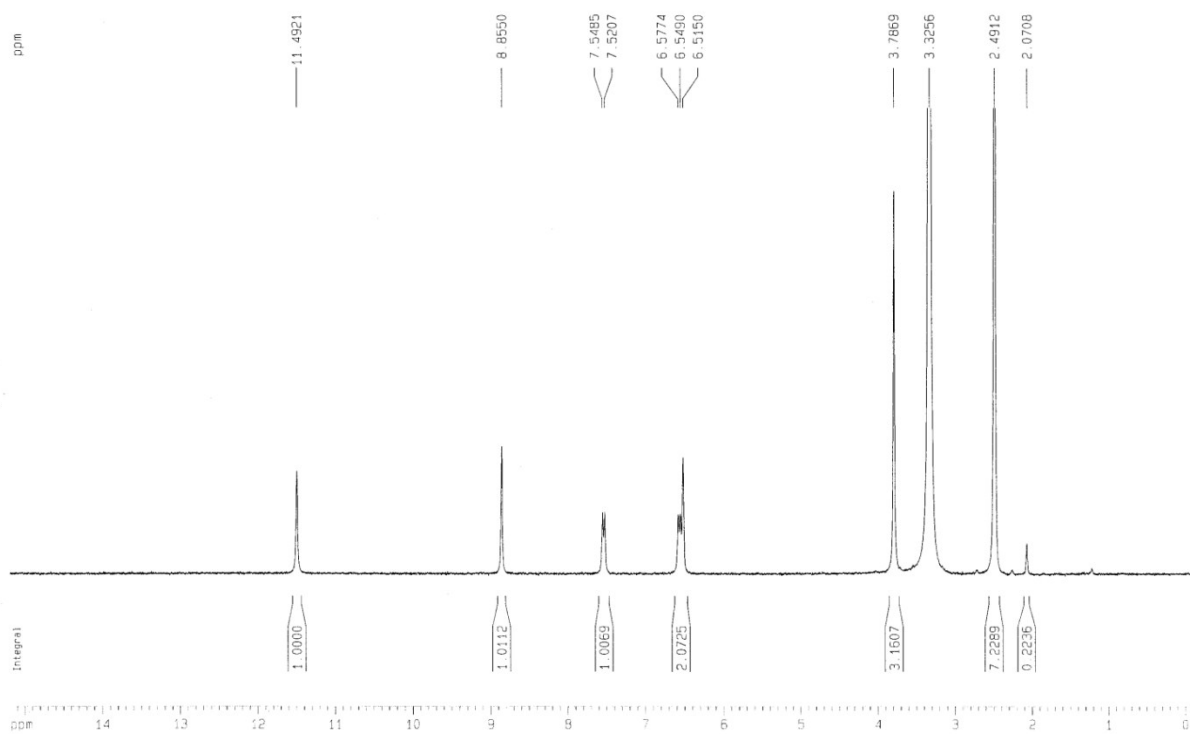

Fig.S2: <sup>1</sup>H-NMR spectra of ligand- H<sub>2</sub>SALNN

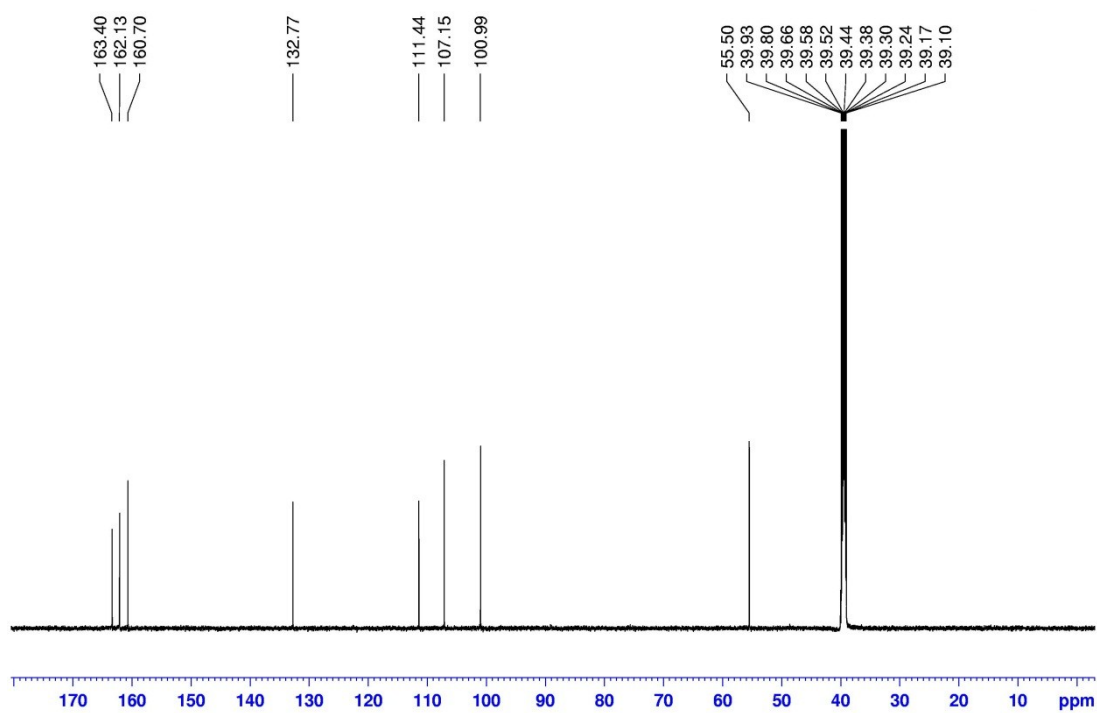

Fig.S3: <sup>13</sup>C-NMR spectra of ligand- H<sub>2</sub>SALNN

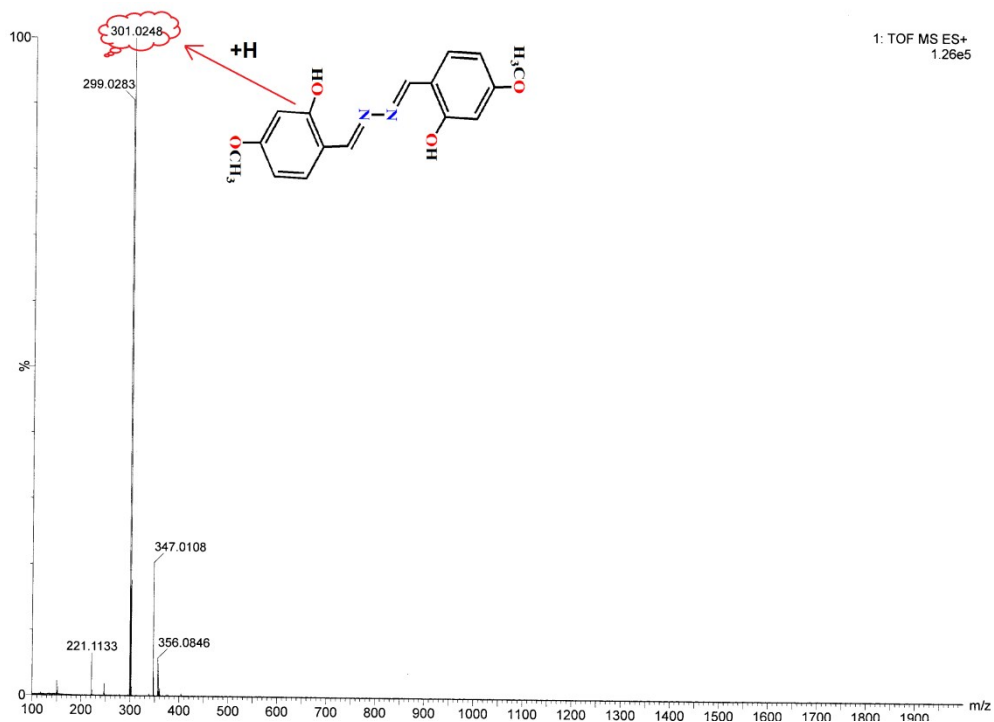

Fig.S4: ESI-MS spectra of ligand- H<sub>2</sub>SALNN

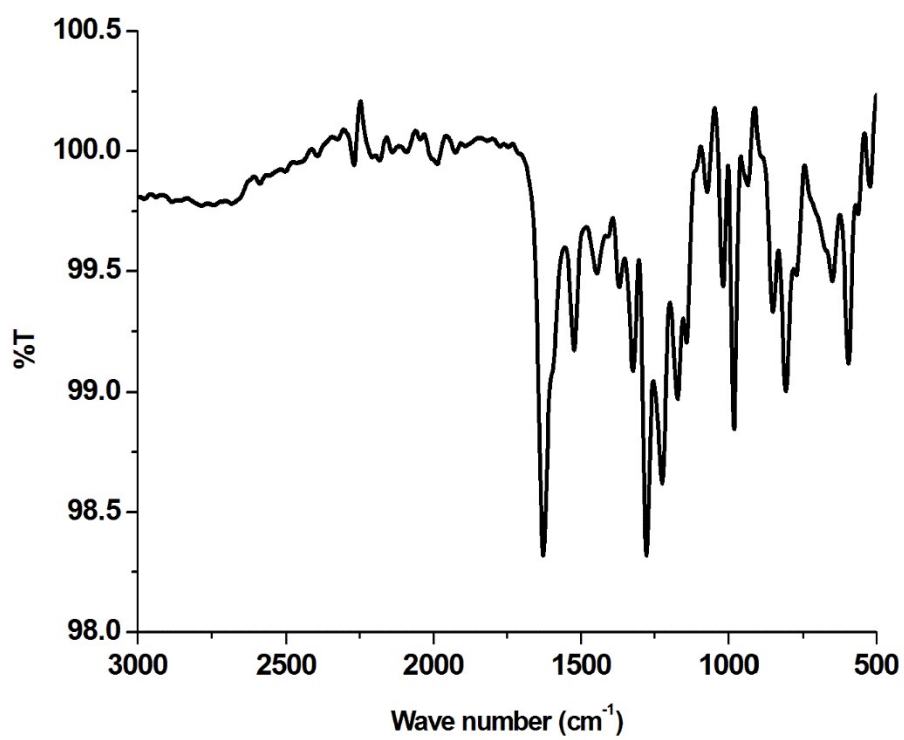

Fig.S5: Infra-red(IR) spectra of ligand- H<sub>2</sub>SALNN.

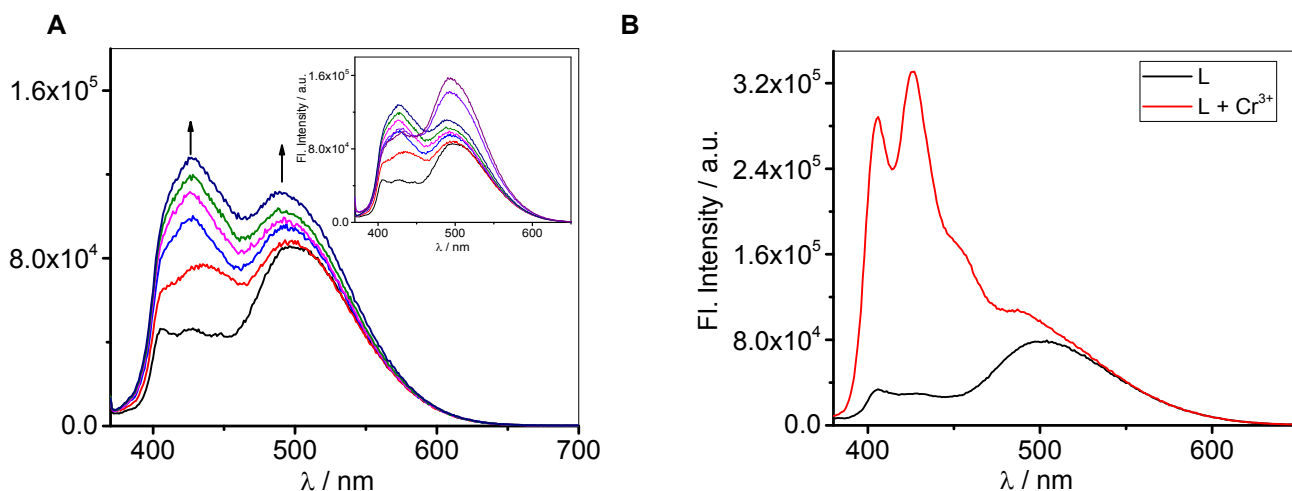

**Figure S6A.** The trend of increase of emission intensity

at the receptor H<sub>2</sub>SALNN ( $c = 2 \times 10^{-5}$  M) with Al<sup>3+</sup> ( $c = 2 \times 10^{-4}$  M) at low concentration of Al<sup>3+</sup>. Inset: The change of emission intensity at high con. of Al<sup>3+</sup> ion. **B.** The initial trend for the change of emission intensity at the receptor H<sub>2</sub>SALNN ( $c = 2 \times 10^{-5}$  M) with Cr<sup>3+</sup> ( $c = 2 \times 10^{-4}$ ).

### Calculation of detection limit:

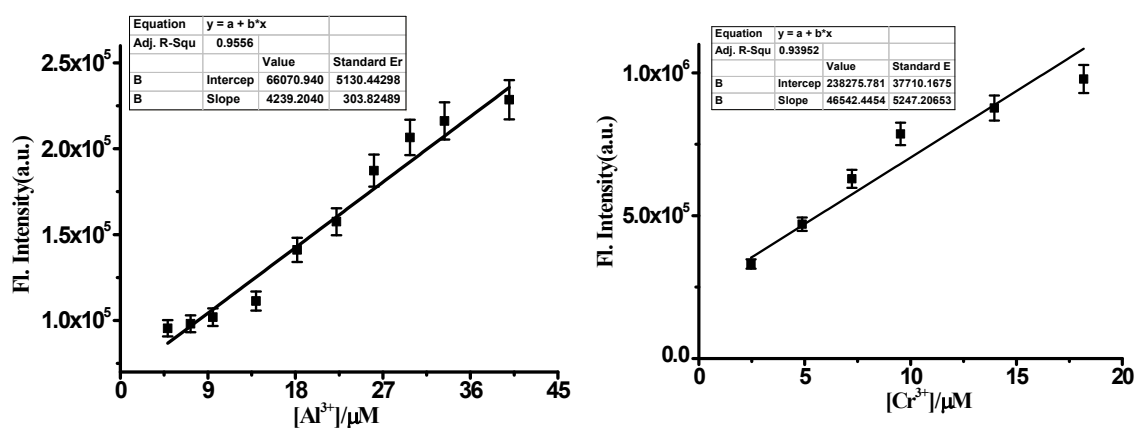

**Fig. S7: (a)** Changes of emission intensity of H<sub>2</sub>SALNN ( $c = 2 \times 10^{-5}$  M) as a function of [Al<sup>3+</sup>] ( $c = 2 \times 10^{-4}$  M) at 490 nm. **(b)** Changes of emission intensity of H<sub>2</sub>SALNN ( $c = 2 \times 10^{-5}$  M) as a function of [Cr<sup>3+</sup>] ( $c = 2 \times 10^{-4}$  M) at 427 nm.

The detection limit (DL) of H<sub>2</sub>SALNN towards Al<sup>3+</sup> and Cr<sup>3+</sup> in emission spectra was determined from the following equation:

$$DL = K \cdot Sb_1 / S$$

Where K = 2 or 3 (we take 2 in this case); Sb<sub>1</sub> is the standard deviation of the blank solution; S is the slope of the calibration curve.

From the graph Fig.S9(a), we get slope = 4239.20, and  $Sb_1$  value is 9430.42.

Thus using the formula we have detected the fluorescence of **H<sub>2</sub>SALNN** using minimum 4.3  $\mu\text{M}$  of  $\text{Al}^{3+}$  solution.

From the graph Fig.S9(b), we get slope = 46542.44, and  $Sb_1$  value is 71412.33.

Thus using the formula we have detected the fluorescence of **H<sub>2</sub>SALNN** using minimum 3.40  $\mu\text{M}$   $\text{Cr}^{3+}$ .

#### **Determination of fluorescence quantum yield:**

Here, the quantum yield  $\phi$  was measured by using the following equation,

$$\phi_x = \phi_s (F_x / F_s) (A_s / A_x) (n_x^2 / n_s^2)$$

Where,

X & S indicate the unknown and standard solution respectively,  $\phi$  = quantum yield,

F = area under the emission curve, A = absorbance at the excitation wave length,

n = index of refraction of the solvent. Here  $\phi$  measurements were performed using anthracene in ethanol as standard [ $\phi = 0.27$ ] (error ~ 10%)

#### **Association constant determination:**

The binding constant value of metal ions  $\text{Al}^{3+}$  and  $\text{Cr}^{3+}$  with the **H<sub>2</sub>SALNN** has been determined from the emission intensity data following the modified Benesi–Hildebrand equation,  $1/\Delta I = 1/\Delta I_{\text{max}} + (1/K[C])(1/\Delta I_{\text{max}})$ . Here  $\Delta I = I - I_{\text{min}}$  and  $\Delta I_{\text{max}} = I_{\text{max}} - I_{\text{min}}$ , where  $I_{\text{min}}$ ,  $I$ , and  $I_{\text{max}}$  are the emission intensities of sensor considered in the absence of guest, at an intermediate concentration and at a concentration of complete saturation of guest where  $K$  is the binding constant and  $[C]$  is the guest concentration respectively. From the plot of  $(I_{\text{max}} - I_{\text{min}})/(I - I_{\text{min}})$  against  $[C]^{-1}$  for sensor, the value of  $K$  has been determined from the slope. The association constant ( $K_a$ ) as determined by fluorescence titration method for **H<sub>2</sub>SALNN** with  $\text{Al}^{3+}$  is found to be  $1.4 \times 10^4 \text{M}^{-1}$  (error < 10%) and  $\text{Cr}^{3+}$  towards **H<sub>2</sub>SALNN** is  $1 \times 10^5 \text{M}^{-1}$ .

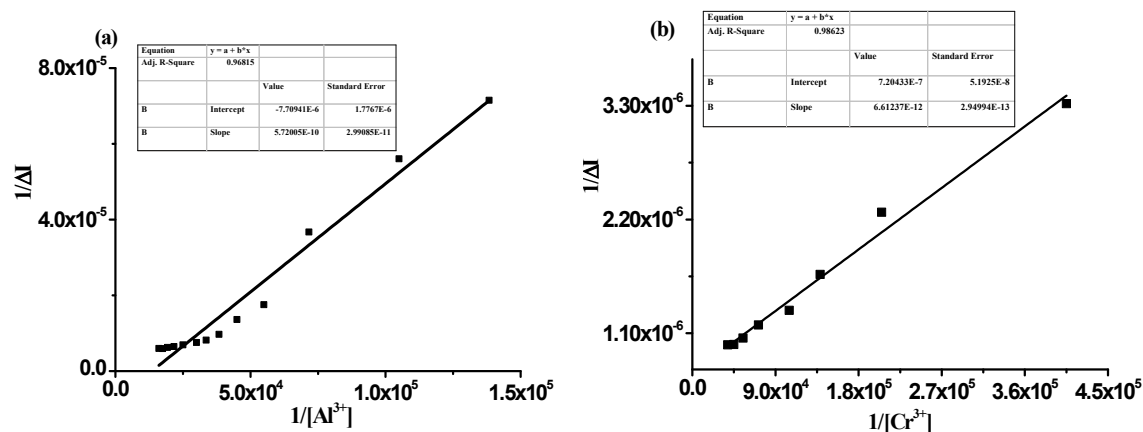

**Fig. S8:** (a) Benesi–Hildebrand plot from fluorescence titration data of  $\text{H}_2\text{SALNN}$  ( $20\mu\text{M}$ ) with  $\text{Al}^{3+}$ . (b) Benesi–Hildebrand plot from fluorescence titration data of  $\text{H}_2\text{SALNN}$  ( $20\mu\text{M}$ ) with  $\text{Cr}^{3+}$ .

**Table S2:** The comparison of  $\text{H}_2\text{SALNN}$  with other hydrazine ligands with the substitution on the basis of different metal ion binding.

| Entry | Ligand structures | Binding metal ions                                      | References |
|-------|-------------------|---------------------------------------------------------|------------|
| 1.    |                   | Ti                                                      | (a)        |
| 2.    |                   | $\text{Fe}^{3+}$<br>$\text{Cu}^{2+}$ , $\text{Al}^{3+}$ | (b)<br>(c) |
| 3.    |                   | $\text{Zn}^{2+}$                                        | (d)        |
| 4.    |                   | $\text{Zn}^{2+}$<br>$\text{Cu}^{2+}$                    | (e)<br>(f) |

|    |                                                                                    |                                       |            |
|----|------------------------------------------------------------------------------------|---------------------------------------|------------|
| 5. | 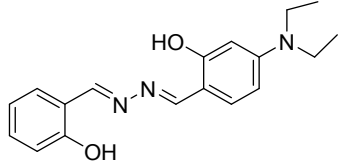  | $\text{Cu}^{2+}$                      | (g)        |
| 6  |   | $\text{Cu}^{2+}$<br>$\text{Al}^{3+}$  | (h)<br>(i) |
| 7  |   | $\text{Zn}^{2+}$                      | (j)        |
| 8  |   | $\text{Co}^{3+}$                      | (k)        |
| 9  |  | $\text{Al}^{3+}$ and $\text{Cr}^{3+}$ | This work  |

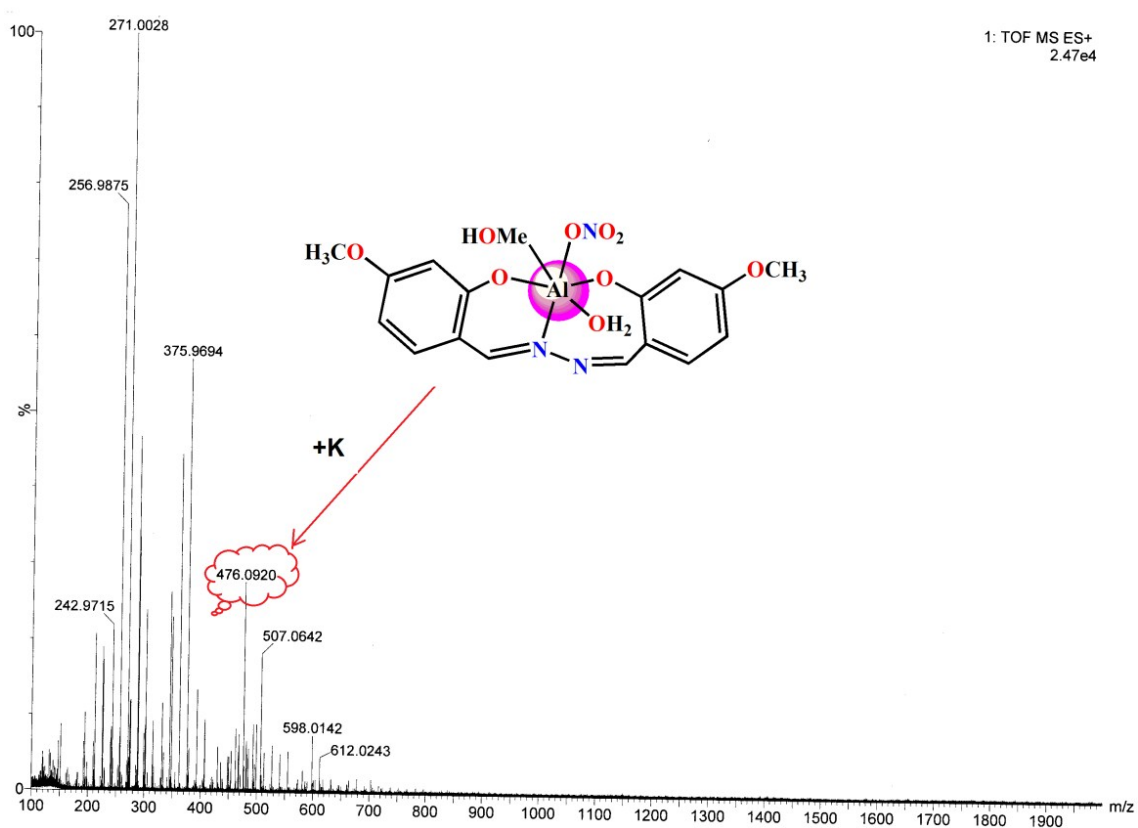

Fig.S9: ESI-MS spectra of complex-1

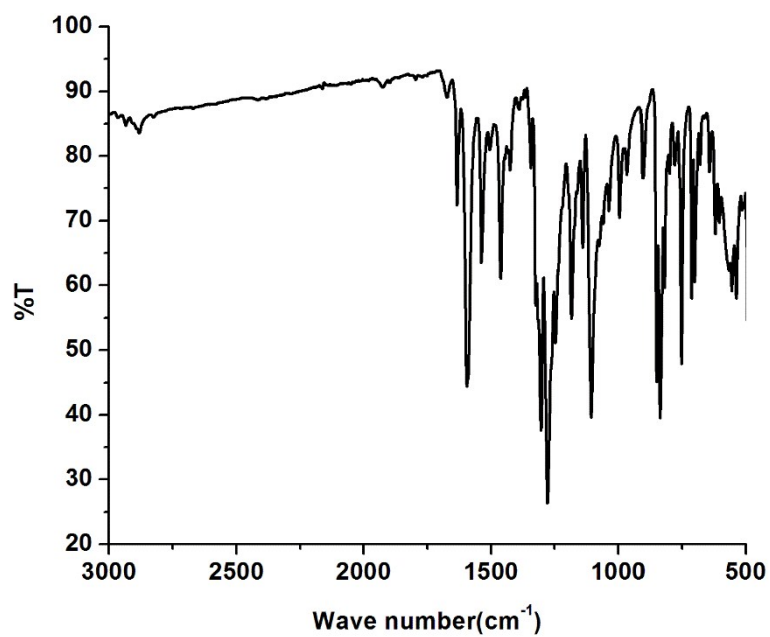

Fig.S10: Infra-red(IR) spectra of complex-1

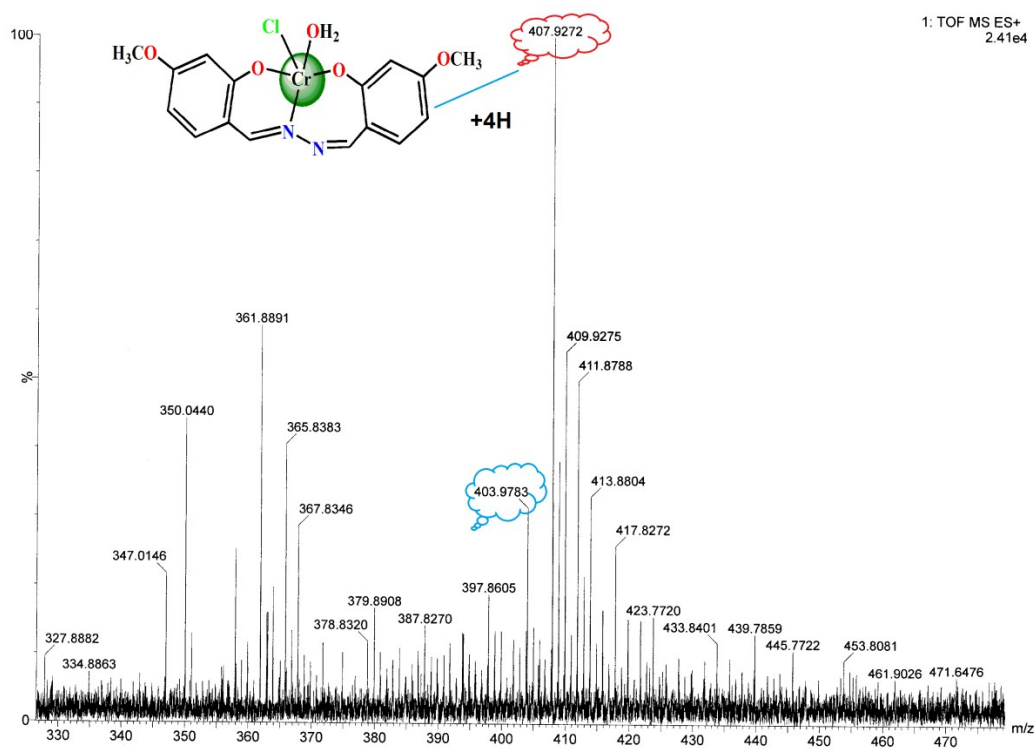

Fig.S11: ESI-MS spectra of complex-2



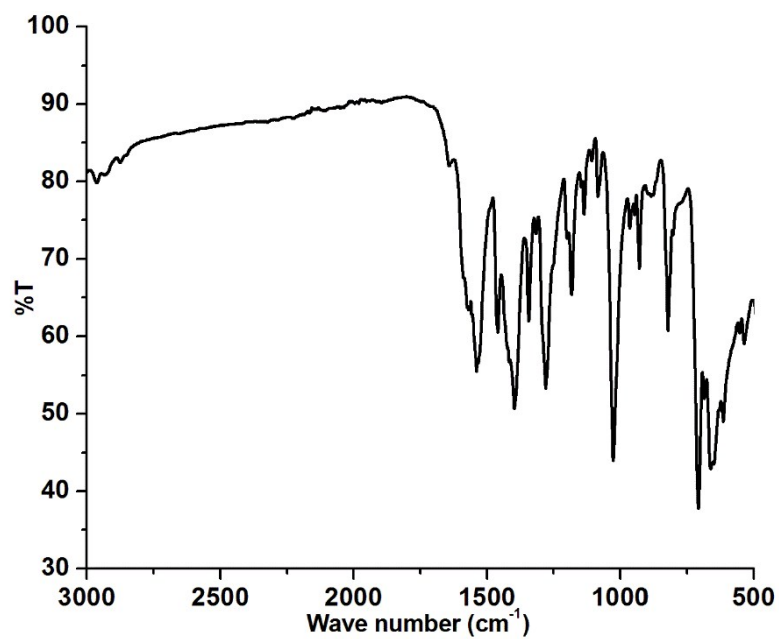

Fig.S12: Infra-red(IR) spectra of complex-2

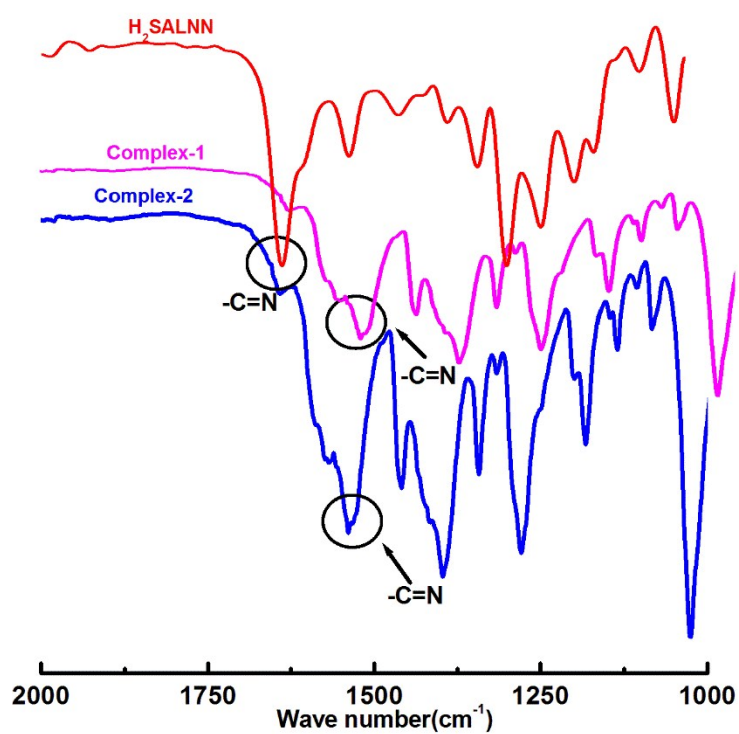

Fig.S13: Compared infra-red(IR) spectra of H<sub>2</sub>SALNN, complex-1 and complex-2.

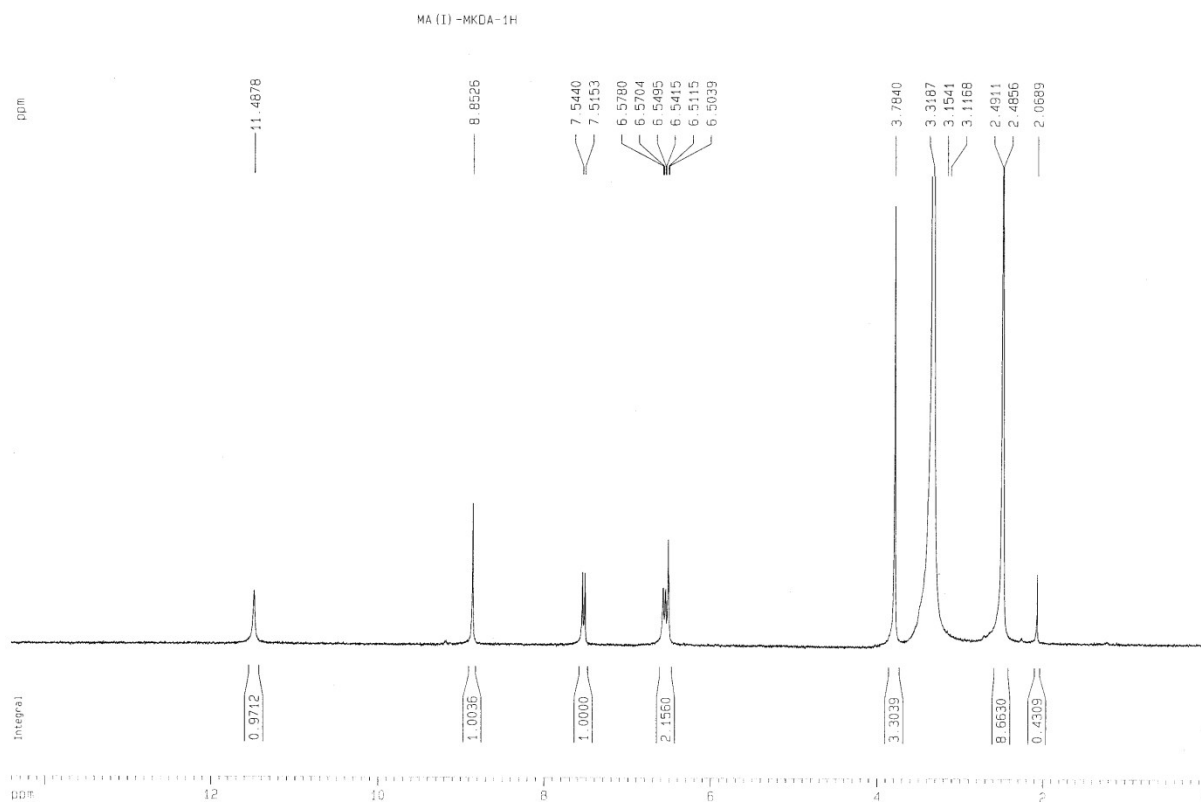

Fig.S14:  $^1\text{H}$ -NMR spectra of 0.5 equivalent addition of  $\text{Al}^{3+}$  on  $\text{H}_2\text{SALNN}$ .

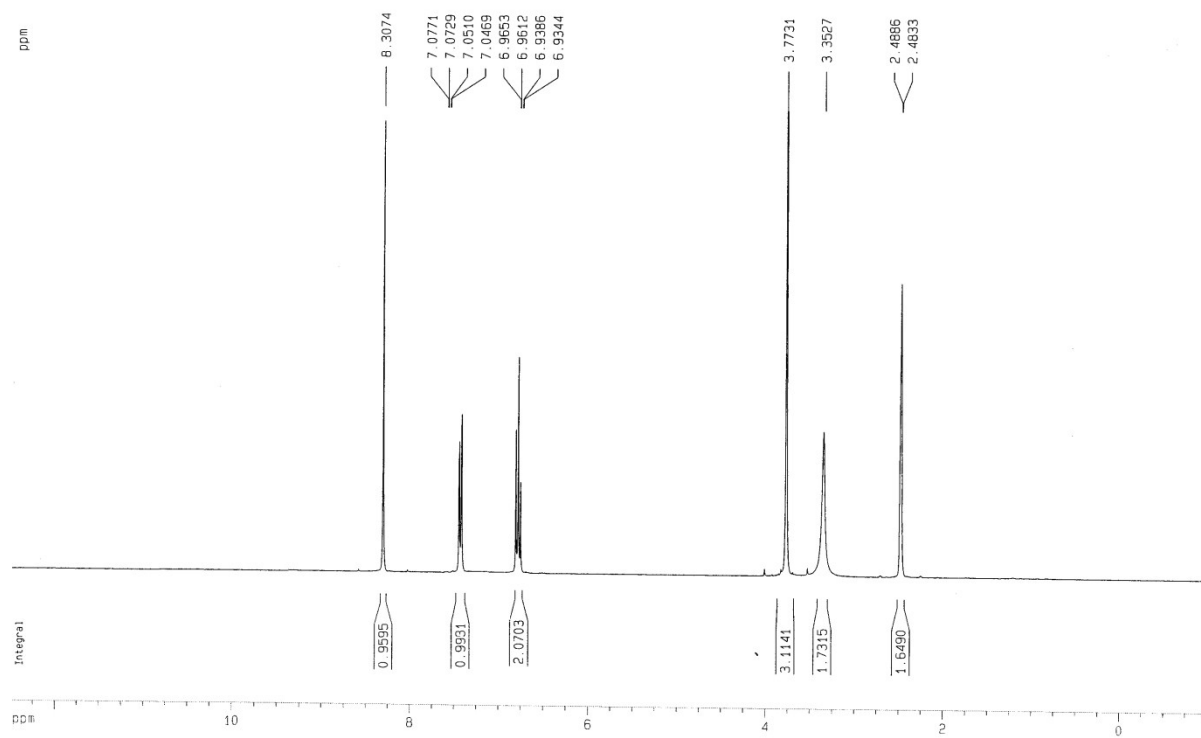

Fig.S15:  $^1\text{H}$ -NMR spectra of 1 equivalent addition of  $\text{Al}^{3+}$  on  $\text{H}_2\text{SALNN}$ .

**Table S3.** Hydrogen bonds for H<sub>2</sub>SALNN [Å and °].

| D-H...A             | d(D-H)    | d(H...A)  | d(D...A)   | <(DHA)    |
|---------------------|-----------|-----------|------------|-----------|
| C(8)-H(8A)...O(2)#2 | 0.98      | 2.49      | 3.2540(12) | 134.4     |
| C(8)-H(8C)...O(1)#3 | 0.98      | 2.59      | 3.3488(12) | 134.0     |
| O(1)-H(1)...N(1)    | 0.883(17) | 1.855(17) | 2.6475(10) | 148.3(16) |

Symmetry transformations used to generate equivalent atoms:

#1 -x,-y+1,-z+1 #2 -x+3/2, y-1/2,-z+1/2 #3 -x+1,-y,-z+1

### References:

- (a) H. C. Tseng, H. Y. Chen, Y. T. Huang, W. Y. Lu, Y. L. Chang, M. Y. Chiang, Y. C. Lai, and H. Y. Chen, *Inorg. Chem.*, 2016, **55**, 1642–1650.
- (b) M. Hong, G. Dong, D. Chun-ying, L. Yu-ting and M. Qing-jin, *J. Chem. Soc., Dalton Trans.*, 2002, 3422–3424.
- (c) C. Gou, S. H. Qin, H. Q. Wu, Y. Wang, J. Luo, X. Y. Liu, *Inorganic Chemistry Communications* 2011, **14**, 1622–1625.
- (d) M. G. Mohamed, R. C. Lin, J. H. Tu, F. H. Lu, J. L. Hong, K. U. Jeong, C. F. Wangd and S. W. Kuo, *RSC Adv.*, 2015, **5**, 65635–65645.
- (e) D. X. Xie, Z. J. Ran, Z. Jin, X. B. Zhang, D. L. An, *Dyes and Pigments* 2013, **96**, 495-499.
- (f) J. Huo, K. Liu, X. Zhao, X. Zhang , Y. Wang, *Spectrochimica Acta Part A: Molecular and Biomolecular Spectroscopy* 2014, **117**, 789–792.
- (g) K. Tiwari, S. Kumar, V. Kumar, J. Kaur, S. Arora, R. K. Mahajan, *Spectrochimica Acta Part A: Molecular and Biomolecular Spectroscopy* 2018, **191**, 16–26.
- (h) T. Sun, Q. Niu, T. Li, Z. Guo, H. Liu, *Spectrochimica Acta, Part A: Molecular and Biomolecular Spectroscopy* 2018, **188**, 411-417.
- (i) A. Ghosh, A. Sengupta, A. Chattopadhyay and D. Das, *RSC Adv.*, 2015, **5**, 24194-24199
- (j) Z. Kowser, U. Rayhan, S. Rahman, P. E. Georgiou, T. Yamato, *Tetrahedron* 2017, **73**, 5418-5424.
- (k) Y. Suenaga, and C. G. Pierpont, *Inorganic Chemistry*, Vol. 44, No. 18, 2005.
